## **A hypothetical intervention to reduce inequities in anxiety for Multiracial people: simulating an intervention on childhood adversity**

### **Authors:**

1. Tracy Lam-Hine, DrPH, Stanford University School of Medicine, Division of Epidemiology & Population Health, Palo Alto, CA
2. Patrick T. Bradshaw, PhD, University of California Berkeley School of Public Health, Division of Epidemiology, Berkeley, CA
3. Amani M. Allen, PhD, University of California Berkeley School of Public Health, Division of Community Health Sciences and Division of Epidemiology, Berkeley, CA
4. Michael Omi, PhD, University of California Berkeley Department of Ethnic Studies, Berkeley, CA
5. Corinne A. Riddell, PhD, University of California Berkeley School of Public Health, Division of Biostatistics and Division of Epidemiology, Berkeley, CA

### **Corresponding Author:**

Tracy Lam-Hine

Tel: 650-721-4944 | Email: [lamhine@stanford.edu](mailto:lamhine@stanford.edu)

Stanford University School of Medicine, Department of Epidemiology & Population Health  
1701 Page Mill Road, Palo Alto, CA 94304

### **Abstract**

Multiracial people report higher mean Adverse Childhood Experiences (ACEs) scores and prevalence of anxiety than other racial groups. Studies using statistical interactions to estimate racial differences in ACEs-anxiety associations do not show stronger associations for Multiracial people. Using data from Waves 1 (1995-97) through 4 (2008-09) of the National Longitudinal Study of Adolescent to Adult Health (Add Health), we simulated a stochastic intervention over 1,000 resampled datasets to estimate the race-specific cases averted per 1,000 of anxiety if all racial groups had the same exposure distribution of ACEs as Whites. Simulated cases averted were greatest for the Multiracial group, (median = -4.17 cases per 1,000, 95% CI: -7.42, -1.86). The model also predicted smaller risk reductions for Black participants (-0.76, 95% CI: -1.53, -0.19). CIs around estimates for other racial groups included the null. An intervention to reduce racial disparities in exposure to ACEs could help reduce the inequitable burden of anxiety on the Multiracial population. Stochastic methods support consequentialist approaches to racial health equity, and can encourage greater dialogue between public health researchers, policymakers, and practitioners.

**Keywords:** stochastic methods, simulation, Multiracial, anxiety, ACEs

## 1 **Background**

2 In his influential paper “Sick individuals and sick populations”, Geoffrey Rose argued that  
3 epidemiology’s roots in biomedicine often leads to a focus on identifying individual-level risk factors  
4 (i.e.: causes of cases), and a failure to recognize the importance of differences in exposure distributions  
5 (i.e.: causes of causes, or what Glass and McAtee call risk regulators) across populations in  
6 determining disease incidence rates (1,2). This paper initiated a burst of critical public health thinking,  
7 some of it focused on how Rose’s “population” strategies – blanket interventions aiming to shift risk  
8 distributions of the whole population – might lessen or exacerbate unjust health disparities (i.e.  
9 inequities) between groups (3,4). Frohlich and Potvin described an alternative “vulnerable populations”  
10 approach, which refocused attention on segments of the population facing excess risk, while  
11 reimagining risk as socially (rather than individually) determined (3). More recently developed causal  
12 inference methods such as parametric G-computation are useful for epidemiologists interested in  
13 moving beyond individual-level risk factors and instead quantifying the differences in population-level  
14 risk associated with interventions (5). Stratified causal estimands can answer the question of “who  
15 benefits, and by how much?” Such analyses can also identify strong associations in “vulnerable”,  
16 small, or oft-ignored populations that may benefit disproportionately from intervention, which is  
17 particularly relevant for redressing historical health injustices.

18

19 However, causal methods are still infrequently applied in racial health disparities research, where race-  
20 stratified analyses or studying race as an effect modifier are more common approaches (6,7). While  
21 simple interaction analyses identify whether exposures operate differently in strata of a possible  
22 modifier (e.g., race), those working in health disparities are concerned with not just identifying but  
23 eliminating disparities. Substitution methods have much to offer to health disparities research because

24 they produce an explicitly consequentialist answer to “who benefits from an intervention, and by how  
25 much?” (8–11). Here, we apply these tools in a racial health equity example by studying associations  
26 between the high mean ACE scores and prevalence of anxiety among the Multiracial population, a  
27 group that is frequently overlooked in population health research but experiences high rates of asthma,  
28 anxiety, and depression. Anxiety is characterized by racial and ethnic disparities in prevalence, linked  
29 to histories of trauma and other mental illness, and is associated with poor quality of life, substance  
30 use, and risk of suicide (12–14). To motivate use of stochastic methods in anxiety disparities research,  
31 we begin first with a fictional case study, and then use empirical data from a nationally-representative  
32 study to demonstrate the approach.

33

#### 34 *Hypothetical scenario*

35 Suppose you are a program planner focused on violence prevention in the Family Health Services  
36 Division (FHSD) of the ABC County Department of Health (DoH). ABC County is a very populous,  
37 urban, and diverse county in California with a large and growing population of Multiracial people. One  
38 day while reviewing literature, you come across a few papers and reports that document stark  
39 disparities in both childhood adversity and anxiety between monoracial and Multiracial people (15–20)  
40 . You know from your work in violence prevention that adverse childhood experiences (ACEs) are  
41 strongly associated with anxiety but were unaware of the striking Multiracial-monoracial disparities.  
42 You find this data particularly troubling, as you realize that health data on Multiracial people is  
43 frequently unavailable, and that Multiracial people are often overlooked in the design of public health  
44 interventions (21). Perhaps you are one of the now one in ten Americans that self-identifies as  
45 Multiracial and thus have a personal interest in the issue (22).

46

47 You reach out to a colleague in the DoH Epidemiology Division and ask for help in pulling some data  
48 on the prevalence of ACEs and anxiety, and investigating patterns in their relationship across racial  
49 groups. Your colleague asks what your goal is, and you respond, “I want to know 1) if health inequities  
50 in anxiety are associated with differential exposure to ACEs, and if so, 2) what racial groups would  
51 benefit most if we could eliminate inequities in exposure?” Fortunately, California Senate Bill 428  
52 mandates California health insurance plans to reimburse providers that conduct screening for ACEs,  
53 and thus ABC County has a wealth of data on the pediatric prevalence of ACEs (23). Your  
54 epidemiologist colleague decides that because you are interested in understanding what populations  
55 should be prioritized for intervention, a sensible approach would be to specify a model regressing  
56 anxiety on an interaction between ACE scores and race (24). Using this model, you can estimate  
57 subgroup-specific risk ratios (RRs) and perform statistical tests to identify which groups experience the  
58 strongest associations and should thus be prioritized.

59  
60 The epidemiologist assembles an appropriate analytic dataset, and runs a model regressing anxiety  
61 diagnosis against ACE scores interacted with race, controlling for individual-level characteristics. This  
62 model’s results show that ACEs and anxiety are most prevalent for the Multiracial group. However  
63 RRs for all racial groups are very close, with narrow and overlapping confidence intervals, and a  
64 global Wald test for interaction is insignificant. The epidemiologist concludes that based on the lack of  
65 difference in associations by race, there is no evidence that any group should be prioritized for  
66 intervention. You present these results to the ABC County health officer and FHSD leadership, who  
67 are explicitly interested in health equity and reducing disparities. You suggest that although  
68 associations do not seem to vary by race, investing in ACEs prevention could help reduce anxiety  
69 inequities for the Multiracial population, given this group’s high exposure to ACEs. The health officer

70 asks you pointedly, “I am not sure results from this analysis support that statement. Show me what  
71 kind of reduction in inequity we can expect – I want numbers”. The objective of this paper is to  
72 demonstrate one approach to answering this question.

73

74 *An alternative approach, using stochastic methods*

75 We present the scenario described here to draw attention to the limitations of statistical interaction  
76 analyses in applied health disparities epidemiology. Statistical interactions have useful properties for  
77 causal inference in epidemiologic research that are described elsewhere (24). However, they are only  
78 one piece of information among many that can help identify appropriate populations for interventions.  
79 If we are interested in understanding which populations will benefit most from an intervention, or  
80 which populations to intervene on to have the greatest overall impact on reducing racial health  
81 disparities, we also need to know the relative sizes of the population subgroups of interest, and the  
82 distribution of exposures and associated confounding characteristics across those subgroups.

83

84 With these data, we can implement a substitution estimator as an alternative approach to identifying  
85 subgroups that will benefit most from a health equity intervention (25). For example, we could  
86 estimate and compare the number of cases of disease per 100 that would be averted in each  
87 subpopulation if their exposure values were set to approximate that of a relatively more advantaged  
88 subgroup, such as those with the lowest exposure levels. We can improve the plausibility of our  
89 estimates by introducing some uncertainty in the form of random variation around the substituted  
90 exposure value. These “stochastic interventions” (5) specify a distribution of possible exposure values  
91 rather than a set deterministic value, which may involve unrealistic assumptions such as universal  
92 uptake or perfect adherence (26). Together, these methods provide a principled approach to health

93 disparities analysis that aligns with calls in the field of epidemiology for a stronger consequentialist  
94 focus, or a focus on informing policy and programs to improve health (8,27).

95

96 We can apply this method to our study question by specifying a regression model similar to the one  
97 used by the epidemiologist, and then using it to estimate a population-level metric. These results  
98 provide one answer to the question of which subgroups would see the greatest relative reduction in  
99 cases from an intervention program to bring health equity in ACEs exposure and anxiety incidence.

100

## 101 **Methods**

102

### 103 *Data and analytic sample*

104 To demonstrate the utility of stochastic methods for disparities research, we now move from our  
105 hypothetical county to using a nationally-representative dataset with a large sample of Multiracial  
106 people for this analysis. The National Longitudinal Study of Adolescent to Adult Health (Add Health),  
107 is a prospective cohort of participants followed from adolescence in the 1990's to early adulthood (28).  
108 Eighty public and private high schools and associated feeder schools for each were selected based on  
109 specific school characteristics. From these schools' rosters, 20,745 participants were selected from  
110 gender and grade-stratified samples, with oversampling of specific population subgroups to create a  
111 representative cohort of all US 7<sup>th</sup>-12<sup>th</sup> graders in 1994-95. Five waves of interviews taking place from  
112 1994-95 to 2016-18 (response rates ranging from 79-80.3%) collected detailed demographic, life and  
113 family history, socioeconomic, educational, health behavior, biomarker, and health and socioeconomic  
114 outcomes data. Study design and details are described elsewhere (29–31). We excluded participants  
115 self-identifying as “Other” race alone because of numbers too small for meaningful interpretation, and

116 participants self-identifying as Hispanic/Latino ethnicity because of the challenges in identifying  
117 Multiracial Hispanic/Latino people when race and Hispanic/Latino ethnicity are assessed separately  
118 (32,33).

119

### 120 *Statistical analyses*

121 The primary outcome in this analysis is a binary indicator of diagnosed anxiety at Wave 4. The  
122 exposure is a summary ACEs score ranging from 0-10, constructed from questions asked  
123 retrospectively across several waves of data collection (see Appendix A for details on score  
124 construction). We estimated RRs using a modified Poisson model (34), regressing a binary indicator of  
125 diagnosed anxiety at Wave 4 on an interaction between ACEs score on a scale of 0-10 (see Appendix  
126 A for details) and Wave 3 race (categorized as monoracial White, Black, Asian, or American  
127 Indian/Native American (AI/NA), or Multiracial). Interaction analyses used Whites as the reference as  
128 they have a relatively low mean ACE score and large sample size in our data, and are structurally and  
129 socioeconomically advantaged compared to other racial groups in the US. We exponentiated  
130 interaction term coefficients to evaluate relative interaction, and used the interaction contrast to  
131 evaluate additive interaction from our outcome model, estimating excess cases per 1,000 (35). The  
132 outcome model specified the following covariates to be confounders and controlled for them using data  
133 from the indicated waves: Wave 4: age, self-reported gender; Wave 1: highest parental education  
134 (categorized ordinally as less than high school, completed vocational school, or equivalency (GED);  
135 high school diploma (HSD); some college; college graduate or greater), household size-adjusted  
136 income (continuous equivalence scale of pretax household income divided by the square of household  
137 size), parental support (mean of five Likert-scale questions about warmth, communication, caring, and  
138 closeness in relationship with parents), and neighborhood disadvantage score (mean of census-tract

139 proportions of households earning less than federal poverty level, households receiving public  
140 assistance, civilian unemployment, persons 25 years or older lacking HSD or GED, and female-headed  
141 households). Further details on variable construction are available in Appendix B.

142

### 143 *Stochastic intervention*

144 Our target causal quantity is the population mean risk difference ( $RD_r$ ) of anxiety ( $Y$ ) if each non-  
145 White racial group's ( $R = r$ ) distribution of ACEs ( $A$ ) reflected the exposure distribution of the White  
146 ( $R = w$ ) population given an individual's covariates ( $X$ ). We chose the ACEs distribution of Whites  
147 because this group on average has a low mean ACE score and the largest sample size to provide  
148 support for precision in estimates of risk differences. Let  $g_w$  denote the ACEs distribution for Whites  
149 conditional on covariates  $X$ . We estimate this parameter following an approach similar to that outlined  
150 in Ahern et al (5). We can then represent the target quantity as a risk difference using the following  
151 notation, where inner expectations are over the exposure distribution given race, and outer expectation  
152 over covariates to estimate population-level average risk:

153

$$RD_r = E_{X|R=r}[E_{A|g_w, X, R=r}(Y|A, X, R = r)] - E_{X|R=r}[E_{A|X, R=r}(Y|A, X, R = r)]$$

154

155 To estimate this distribution, we used Monte Carlo simulation methods to represent interventions on  
156 the ACE score for non-White participants with some stochastic variation (5,36). Specifying a  
157 substitution estimator that accounts for the stochastic nature of the intervention across the population,  
158 rather than intervening on ACE scores with a static, uniform value, is appealing as it is often unrealistic  
159 to assume that every person receiving the intervention is affected in a uniform manner (5,36).  
160 Specifying a substitution estimator with variation in the intervention is beneficial as it is unrealistic to



161 assume that every person receiving the ACEs prevention intervention would with certainty experience  
162 the targeted (mean of White group) ACEs score (26). To estimate the number of cases of anxiety  
163 averted for each racial group, we average over  $i = 1,000$  simulated risk differences for each racial  
164 group. To calculate simulation-based confidence intervals (here forth CIs), we use parameter  
165 resampling instead of bootstrapping (37–39) as it is more computationally efficient for complex  
166 estimands such as population-level parameters that incorporate survey design effects.

167

168 We used complex survey weights to incorporate design effects using the “survey” package in R (40).  
169 Because of high levels of missingness in ACE components, covariates, and outcomes (distributions and  
170 frequencies of missing information available in Appendix C), we performed multiple imputation to  
171 reduce biased estimation due to missing data using the “mi” and “mitools” packages in R (41,42). We  
172 performed Markov chain imputation with 30 iterations and 4 chains, including the anxiety outcome in  
173 our imputation model, and pooled results across 20 imputed datasets.

174

175 The following steps summarize implementation of the stochastic intervention approach, which is based  
176 off the approach of Ahern et al (5).

177

- 178 1. First, we use the estimated beta coefficients and variance-covariance matrix from our  
179 outcome model to generate a single resampled value of the beta coefficients from a  
180 multivariate normal distribution (37–39).
- 181 2. We then resample covariate values with replacement  $m$  times from one imputed data  
182 frame, where  $m =$  number of observations in the dataset. We use these resampled data to  
183 get the distribution of covariates under no intervention.

- 184 3. We use the coefficients sampled in step 1 to obtain the predicted probability of anxiety for  
185 each observation, and then sum across all observations for each racial group to estimate  
186 the race-specific prevalence of anxiety under no intervention.
- 187 4. Next, we create a copy of the resampled data from step 2, replacing the ACEs score for all  
188 non-White participants with simulated value from a Poisson distribution, with the rate  
189 parameter estimated from a Poisson model fit among White participants.
- 190 5. We repeat step 3 to calculate the prevalence of anxiety in this single draw from the  
191 intervention distribution.
- 192 6. We calculate the risk differences by race as the averaged risk differences across each  
193 observation in the various racial groups from the resampled population.
- 194 7. Finally, we repeat this procedure 1,000 times to build up the sampling distribution of the  
195 race-specific RD. From these 1,000 resampled estimates, we report median differences as  
196 race-specific point estimates and quantile-based 95% CIs around the risk differences.

197  
198 Example code in R for this simulation is provided as a link in this article's supplementary material.

199

## 200 **Results**

201 Table 1 summarizes parameters from the outcome model. Mean ACE scores were highest among  
202 AI/NA (3.16), Multiracial (2.90), and Black (2.84) groups. Anxiety prevalence was highest among the  
203 Multiracial (18.2%) and White (15.0%) groups. An additional ACE was weakly associated with  
204 increased risk of anxiety among White (RR = 1.02, 95% CI: 1.01, 1.02) and Multiracial (RR = 1.03,  
205 95% CI: 1.02, 1.05) groups. RRs for other groups were centered around the null, with narrow CIs. The  
206 models predicted relatively fewer excess cases per 1,000 for Black (-7.94), Asian (-20.2), and AI/NA (-

207 18.5) participants compared to Whites, but more for Multiracial (17.0) participants. Confidence  
208 intervals were most precise around estimates for the Black group (95% CI: -18.1, 1.88), and least  
209 precise for the AI/NA estimate (95% CI: -41.4, 1.93).

210

211 Table 2 presents the baseline and intervened ACE scores for each racial group, and a summary of the  
212 population-averaged results of our simulated intervention. Mean resampled baseline ACE scores are  
213 slightly lower than in the original dataset, reflecting the influence of outliers in the original data which  
214 were less frequently selected in repeated resampling. Differences in mean baseline scores are most  
215 pronounced for Black participants (original = 2.84, resampled = 2.69). Figure 1 shows that our  
216 stochastic intervention shifted the ACEs distribution lower most substantially for the AI/NA  
217 population, followed by substantial shifts in distribution for the Black and Multiracial populations. For  
218 the Asian population, the distribution shift was mixed, and resulted in fewer individuals with no ACEs  
219 and more individuals with ACE scores of 2 and 3. The intervention resulted in a slightly higher mean  
220 ACE score for the Asian group; we report the means here for consistency of presentation, but a real  
221 intervention would never be designed to increase one group's exposure to a putative risk factor. We did  
222 not intervene on the White distribution, and so there was no change in shape for that group.

223

224 The median risk difference was largest for the Multiracial population, with 4.17 cases per 1,000  
225 averted under repeated draws of the simulation. Our model estimated that the intervention would  
226 prevent 0.76 cases per 1,000 among the Black population. The model predicted an decrease of 0.01  
227 cases per 1,000 for Asians, and an increase of 0.03 cases per 1,000 for AI/NA participants. CIs for the  
228 Asian and AI/NA groups both crossed the null, and were wider for the AI/NA group..

229

230 Figure 2 plots the population-averaged risk differences produced in each of our 1,000 intervention  
231 draws across 1,000 resampled datasets. Estimate precision was greatest for Black, Asian, and  
232 Multiracial groups; there was much higher variability in the risk differences for AI/NA groups. These  
233 are reflected in the quantile-based 95% CIs in Table 2.

234

235 **Table 1.** Summary of results from adjusted<sup>a</sup> interaction models for anxiety, Add Health 1994-2008

236 < Table 1 here >

237

238 **Table 2.** Summary of mean ACE scores and cases of anxiety averted per 1,000 under stochastic  
239 intervention, Add Health 1994-2008

240 < Table 2 here >

241

242 **Figure 1.** Comparison of intervention and baseline ACE score distributions resulting from  
243 1,000 resampled datasets, Add Health 1994-2008

244 < Figure 1 here >

245

246 **Figure 2.** Simulated number of cases of anxiety averted per 1,000 population, results from  
247 1,000 resampled datasets, Add Health 1994-2008

248 < Figure 2 here >

249

250

## 251 **Discussion**

252 In this paper we illustrate a principled approach to estimating differences in the population impact of a

253 hypothetical intervention in defined subgroups, as one way of identifying groups that might benefit the  
254 most from the intervention. Our analysis shows that there are substantial racial differences in the  
255 number of anxiety cases averted associated with an intervention to reduce disparities in exposure to  
256 ACEs, with the Multiracial population standing to benefit most from such an intervention. These  
257 differences are easily masked in subgroup analyses, where population sizes and distribution of  
258 exposures are not usually considered. However, as we have demonstrated, stochastic intervention  
259 models allow us to quantify the reduction in burden of disease across racial groups at a population  
260 level under altered exposure distributions.

261

262 Ahern et al (5) position stochastic methods as a way to study the potential effects of population- or  
263 community-level policies on exposure distributions and their associations with changes in incidence of  
264 disease. However, these methods are also a natural fit for consequentialist health equity research.  
265 Health equity exists when everyone has a fair and equal opportunity to realize their full health  
266 potential, which requires addressing inequity in exposure to risk factors for disease (43). Modeling  
267 shifts in exposure distributions – or elimination altogether of disparities – allows us to both envision  
268 and quantify a more equitable counterfactual reality. Furthermore, stochastic methods (and other  
269 modern approaches such as G-methods) (44,45) do not require deterministically setting counterfactual  
270 exposure values, providing analytic flexibility not offered by more traditional regression and  
271 standardization approaches. Finally, stochastic methods provide an alternative approach to identifying  
272 priority subgroups for intervention, which is most frequently assessed using interaction (and  
273 increasingly, mediation) (46) analyses.

274

275 A natural next step for practitioners interested in reducing anxiety incidence among the Multiracial

276 population would be to contextualize the results from this simulation with other potential interventions,  
277 and potentially to compare costs in a cost-effectiveness analysis. These methods can be extended to  
278 model different kinds of interventions – for example, a uniform reduction in the ACEs score rather  
279 than a shifting of distributions – or an intervention reducing the ACE score of individuals within a  
280 given strata of socioeconomic position. Our alteration of exposure patterns is just one example of a  
281 potential intervention to reduce inequities in anxiety, but it draws attention to the differential impact by  
282 racial group such an intervention could produce.

283

284 This study had limitations. Our estimates can only be interpreted as causal under the identifiability  
285 assumptions: exchangeability, stability, positivity, and consistency (47). Modeling the exposure as a  
286 count of ACEs may challenge positivity given the relative rarity of participants reporting 6 or more  
287 ACEs. High variability in the AI/NA group’s RR estimates from the underlying outcome model are not  
288 eliminated with repeated resampling; future studies should make greater efforts to include larger  
289 proportions of vulnerable populations to improve inference. Our demonstration is purely hypothetical  
290 because it models intervening directly on ACEs; in reality ACE prevention strategies target  
291 determinants of ACEs such as family psychosocial or economic stress or caring adult presence (48).  
292 Simulating interventions to modify *determinants* of ACEs would have more policy relevance and thus  
293 better align with calls for consequentialist epidemiologic research. Still, we believe simulating  
294 intervention on ACE scores is useful for demonstrating the limitations of focusing solely on identifying  
295 subgroup associations. Finally, our simulations do not specify a dependence between the intervened  
296 ACEs score and an individual’s set of covariates. It is unlikely that the effect of a real intervention  
297 would be random; instead, effects would likely be associated with an individual’s SEP, environment,  
298 access to care, and other characteristics. Incorporating such individual-level covariate data to model a

299 real-world intervention more realistically would improve quality of inference.

300

301 The Multiracial population's disproportionate exposure to ACEs and prevalence of anxiety are  
302 concerning, yet this group is rarely highlighted in discussions of health equity, let alone prioritized for  
303 receiving preventative interventions. Our analysis shows that racial inequities in exposure to ACEs are  
304 associated with substantial population-level disparities in anxiety, and that the Multiracial population  
305 would benefit significantly from a reduction in ACEs compared to other groups. Strategies to address  
306 inequities in anxiety for the Multiracial population may benefit by including interventions to reducing  
307 exposure to ACEs among Multiracial children and families. Public health researchers and practitioners  
308 should employ rigorous methodologies to weigh different interventions and suitable target populations  
309 to remedy inequities in exposures and health outcomes. Health equity will only be achieved when  
310 disparities between populations are addressed, and stochastic methods are one among many that can  
311 help us make progress towards those aims.

### **Conflict of interest statement**

This work was supported by NIH-NCATS-CTSA grant UL1TR003142 and contract 75D30122P12974 with the Centers for Disease Control and Prevention.

### **Financial disclosures**

No financial disclosures were reported by the authors of this paper.

**Acknowledgements:** We would like to thank Add Health study participants for their time, energy, and information which provide invaluable contributions to science. Thanks as well to Kim Harley for providing access to the data, and to Christian Jackson for reviewing the code used in this analysis.

**Data and code availability:** This analysis used restricted data (made available through a data use agreement); a public-use subset is available at <https://addhealth.cpc.unc.edu/data/>. Example code in R for this analysis is available at [https://github.com/lambhine/stochastic\\_intervention](https://github.com/lambhine/stochastic_intervention).



## References

1. Rose G. Sick Individuals and Sick Populations. *Int J Epidemiol*. 1985;14(1):32–8.
2. Glass TA, McAtee MJ. Behavioral science at the crossroads in public health: Extending horizons, envisioning the future. *Social Science & Medicine*. 2006 Apr;62(7):1650–71.
3. Frohlich KL, Potvin L. Transcending the known in public health practice: the inequality paradox: the population approach and vulnerable populations. *Am J Public Health*. 2008 Feb;98(2):216–21.
4. McLaren L, McIntyre L, Kirkpatrick S. Rose’s population strategy of prevention need not increase social inequalities in health. *International Journal of Epidemiology*. 2010 Apr 1;39(2):372–7.
5. Ahern J, Colson KE, Margerson-Zilko C, Hubbard A, Galea S. Predicting the Population Health Impacts of Community Interventions: The Case of Alcohol Outlets and Binge Drinking. *Am J Public Health*. 2016 Nov;106(11):1938–43.
6. Jones CP. Invited Commentary: “Race,” Racism, and the Practice of Epidemiology. *American Journal of Epidemiology*. 2001 Aug 15;154(4):299–304.
7. Benmarhnia T, Hajat A, Kaufman JS. Inferential challenges when assessing racial/ethnic health disparities in environmental research. *Environ Health*. 2021 Dec;20(1):7.
8. Galea S. An Argument for a Consequentialist Epidemiology. *American Journal of Epidemiology*. 2013 Oct 15;178(8):1185–91.
9. Galea S, Link BG. Six Paths for the Future of Social Epidemiology. *American Journal of Epidemiology*. 2013 Sep 15;178(6):843–9.
10. VanderWeele TJ, Robinson WR. Rejoinder: how to reduce racial disparities?: Upon what to intervene? *Epidemiology*. 2014 Jul;25(4):491–3.
11. Harper S, Strumpf EC. Commentary: Social Epidemiology Questionable Answers and Answerable Questions. *Epidemiology*. 2012 Nov;23(6):795–8.
12. Terlizzi EP, Villarroel MA. Symptoms of Generalized Anxiety Disorder Among Adults: United States, 2019. National Center for Health Statistics; 2020.
13. Weisberg RB. Overview of Generalized Anxiety Disorder: Epidemiology, Presentation, and Course. *J Clin Psychiatry*.
14. DeMartini J, Patel G, Fancher TL. Generalized Anxiety Disorder. *Ann Intern Med*. 2019 Apr 2;170(7):ITC49.
15. National Center for Health Statistics. Summary Health Statistics, Mental Health Conditions: National Health Interview Survey, 2018 [Internet]. 2018 [cited 2023 Mar 14]. Available from: [https://ftp.cdc.gov/pub/Health\\_Statistics/NCHS/NHIS/SHS/2018\\_SHS\\_Table\\_A-8.pdf](https://ftp.cdc.gov/pub/Health_Statistics/NCHS/NHIS/SHS/2018_SHS_Table_A-8.pdf)

16. Merrick MT, Ford DC, Ports KA, Guinn AS. Prevalence of Adverse Childhood Experiences From the 2011-2014 Behavioral Risk Factor Surveillance System in 23 States. *JAMA Pediatr.* 2018 Nov 1;172(11):1038.
17. Giano Z, Wheeler DL, Hubach RD. The frequencies and disparities of adverse childhood experiences in the U.S. *BMC Public Health.* 2020 Dec;20(1):1327.
18. Hall T, Rooks R, Kaufman C. Intersections of Adverse Childhood Experiences, Race and Ethnicity and Asthma Outcomes: Findings from the Behavioral Risk Factor Surveillance System. *IJERPH.* 2020 Nov 7;17(21):8236.
19. Weller BE, Conrad JK, Wilburn VG, Ramamonjiarivelo Z, Gladden J. Adverse childhood experiences and mental health conditions among multiracial adolescents. *Ethnicity & Health.* 2021 Jan 21;1–15.
20. Johnson RM, Hill AV, Jones VC, Powell TW, Dean LT, Gilreath TD. Racial/Ethnic Inequities in Adverse Childhood Experiences and Selected Health-Related Behaviors and Problems Among Maryland Adolescents. *Health Promotion Practice.* 2021 Apr 24;15248399211008238.
21. Charmaraman L, Woo M, Quach A, Erkut S. How have researchers studied multiracial populations? A content and methodological review of 20 years of research. *Cultural Diversity and Ethnic Minority Psychology.* 2014;20(3):336–52.
22. Bureau UC. 2020 Census Illuminates Racial and Ethnic Composition of the Country [Internet]. *Census.gov.* [cited 2022 Mar 7]. Available from: <https://www.census.gov/library/stories/2021/08/improved-race-ethnicity-measures-reveal-united-states-population-much-more-multiracial.html>
23. Hurtado M. Health care coverage: adverse childhood experiences screenings [Internet]. Sect. 1367.34, CA SB-428 Oct 7, 2021. Available from: [https://leginfo.legislature.ca.gov/faces/billTextClient.xhtml?bill\\_id=202120220SB428](https://leginfo.legislature.ca.gov/faces/billTextClient.xhtml?bill_id=202120220SB428)
24. VanderWeele TJ, Knol MJ. A Tutorial on Interaction. *Epidemiologic Methods* [Internet]. 2014 Jan 1 [cited 2022 Apr 26];3(1). Available from: <https://www.degruyter.com/document/doi/10.1515/em-2013-0005/html>
25. Maldonado G. Estimating causal effects. *International Journal of Epidemiology.* 2002 Apr 1;31(2):422–38.
26. Bembom O, van der Laan MJ. A practical illustration of the importance of realistic individualized treatment rules in causal inference. *Electron J Stat.* 2007;1:574–96.
27. Nandi A, Harper S. How Consequential Is Social Epidemiology? A Review of Recent Evidence. *Curr Epidemiol Rep.* 2015 Mar;2(1):61–70.
28. Harris KM, Udry JR. National Longitudinal Study of Adolescent to Adult Health (Add Health), 1994-2008 [Public Use]: Version 21 [Internet]. Inter-University Consortium for Political and Social Research; 2008 [cited 2021 Mar 11]. Available from:

<https://www.icpsr.umich.edu/icpsrweb/DSDR/studies/21600/versions/V21>

29. Harris KM. The Add Health Study: Design and Accomplishments. 2013 [cited 2022 Jan 11]; Available from: <https://cdr.lib.unc.edu/concern/articles/6t053j27s?locale=en>
30. Chen P. Guidelines for Analyzing Add Health Data. 2014 [cited 2022 May 5]; Available from: <https://cdr.lib.unc.edu/concern/articles/k0698990v?locale=en>
31. Harris KM, Halpern CT, Whitsel EA, Hussey JM, Killeya-Jones LA, Tabor J, et al. Cohort Profile: The National Longitudinal Study of Adolescent to Adult Health (Add Health). *International Journal of Epidemiology*. 2019 Oct 1;48(5):1415–1415k.
32. Udry JR, Li RM, Hendrickson-Smith J. Health and Behavior Risks of Adolescents with Mixed-Race Identity. *Am J Public Health*. 2003 Nov;93(11):1865–70.
33. Taylor P, Lopez MH, Martínez J, Velasco G. When Labels Don't Fit: Hispanics and Their Views of Identity [Internet]. Pew Research Center's Hispanic Trends Project. 2012 [cited 2022 Jul 22]. Available from: <https://www.pewresearch.org/hispanic/2012/04/04/when-labels-dont-fit-hispanics-and-their-views-of-identity/>
34. Zou G. A Modified Poisson Regression Approach to Prospective Studies with Binary Data. *American Journal of Epidemiology*. 2004 Apr 1;159(7):702–6.
35. Richardson DB, Kaufman JS. Estimation of the relative excess risk due to interaction and associated confidence bounds. *Am J Epidemiol*. 2009 Mar 15;169(6):756–60.
36. Muñoz ID, van der Laan M. Population Intervention Causal Effects Based on Stochastic Interventions. *Biometrics*. 2012 Jun;68(2):541–9.
37. Greenland S. Interval estimation by simulation as an alternative to and extension of confidence intervals. *International Journal of Epidemiology*. 2004 Dec 1;33(6):1389–97.
38. Greenland S. Model-based Estimation of Relative Risks and Other Epidemiologic Measures in Studies of Common Outcomes and in Case-Control Studies. *American Journal of Epidemiology*. 2004 Aug 15;160(4):301–5.
39. Greenland S. The Impact of Prior Distributions for Uncontrolled Confounding and Response Bias: A Case Study of the Relation of Wire Codes and Magnetic Fields to Childhood Leukemia. *Journal of the American Statistical Association*. 2003 Mar;98(461):47–54.
40. Lumley T. Analysis of Complex Survey Samples. *J Stat Soft* [Internet]. 2004 [cited 2022 Mar 14];9(8). Available from: <http://www.jstatsoft.org/v09/i08/>
41. Su YS, Gelman A, Hill J, Yajima M. Multiple Imputation with Diagnostics ( **mi** ) in R: Opening Windows into the Black Box. *J Stat Soft* [Internet]. 2011 [cited 2022 Jul 22];45(2). Available from: <http://www.jstatsoft.org/v45/i02/>
42. Lumley T. mitools: Tools for Multiple Imputation of Missing Data [Internet]. 2019 [cited 2022 Jul

- 22]. Available from: <https://CRAN.R-project.org/package=mitools>
43. Advancing Health Equity in Chronic Disease Prevention and Management | CDC [Internet]. 2022 [cited 2023 Apr 11]. Available from: <https://www.cdc.gov/chronicdisease/healthequity/index.htm>
44. Naimi AI, Cole SR, Kennedy EH. An Introduction to G Methods. *Int J Epidemiol*. 2016 Dec 30;dyw323.
45. Taubman SL, Robins JM, Mittleman MA, Hernán MA. Intervening on risk factors for coronary heart disease: an application of the parametric g-formula. *International Journal of Epidemiology*. 2009 Dec;38(6):1599–611.
46. Naimi AI, Schnitzer ME, Moodie EEM, Bodnar LM. Mediation Analysis for Health Disparities Research. *Am J Epidemiol*. 2016 Aug 15;184(4):315–24.
47. Hernán MA. Beyond exchangeability: The other conditions for causal inference in medical research. *Stat Methods Med Res*. 2012 Feb 1;21(1):3–5.
48. Centers for Disease Control and Prevention. Preventing Adverse Childhood Experiences: Leveraging the Best Available Evidence. Atlanta, GA: National Center for Injury Prevention and Control, Centers for Disease Control and Prevention; 2019 p. 40.

**Table 1.** Summary of results from adjusted<sup>a</sup> interaction models for anxiety, Add Health 1994-2008

| Group       | n (%)         | Mean score <sup>b</sup> | Anxiety prevalence <sup>c</sup> | Adjusted RR <sup>d</sup> (95% CI) | Excess cases <sup>e</sup> per 1,000 (95% CI) |
|-------------|---------------|-------------------------|---------------------------------|-----------------------------------|----------------------------------------------|
| White       | 7,742 (73.5%) | 2.34                    | 15.2%                           | 1.02 (1.01, 1.02)                 | (ref.)                                       |
| Black       | 2,915 (16.9%) | 2.84                    | 5.95%                           | 1.01 (1.00, 1.02)                 | -7.94 (-18.1, 1.88)                          |
| Asian       | 805 (3.18%)   | 2.30                    | 2.93%                           | 1.00 (0.99, 1.01)                 | -20.2 (-31.4, -10.0)                         |
| AI/NA       | 76 (0.55%)    | 3.16                    | 3.26%                           | 1.00 (0.98, 1.02)                 | -18.5 (-41.4, 1.93)                          |
| Multiracial | 834 (5.28%)   | 2.90                    | 17.6%                           | 1.03 (1.02, 1.05)                 | 17.0 (-1.15, 34.3)                           |

<sup>a</sup> Outcome model adjusted for participant age, sex, parental education, household size-adjusted income, parental support, and neighborhood disadvantage score

<sup>b</sup> Individual weighted scores summed after imputation of missing ACE components

<sup>c</sup> Weighted prevalence

<sup>d</sup> RR associated with an additional ACE, within racial group

<sup>e</sup> Excess cases estimated using interaction contrast (additive excess risk)

**Table 2.** Summary of mean ACE scores and cases of anxiety averted per 1,000 under stochastic intervention, Add Health 1994-2008

| Group       | Resampled mean score <sup>a</sup> | Intervened mean score <sup>b</sup> | Median cases averted per 1,000 (95% CI) | Std. error |
|-------------|-----------------------------------|------------------------------------|-----------------------------------------|------------|
| White       | 2.35                              | 2.35                               | (ref.)                                  | (ref.)     |
| Black       | 2.69                              | 2.34                               | -0.77 (-1.51, -0.20)                    | 0.011      |
| Asian       | 2.29                              | 2.35                               | -0.01 (-0.33, 0.18)                     | 0.004      |
| AI/NA       | 3.09                              | 2.35                               | 0.13 (-4.03, 4.37)                      | 0.063      |
| Multiracial | 2.90                              | 2.34                               | -4.11 (-7.10, -1.78)                    | 0.043      |

<sup>a</sup> Resampled mean scores differ slightly from means from outcome model, which may reflect influence of outliers in original data which were selected less frequently in resampling

<sup>b</sup> Intervention replaces the ACEs score for all non-White participants with a draw from a Poisson distribution with rate parameter equal to the mean ACE score for White participants

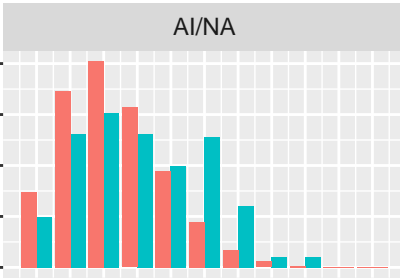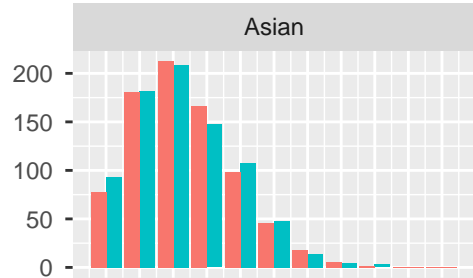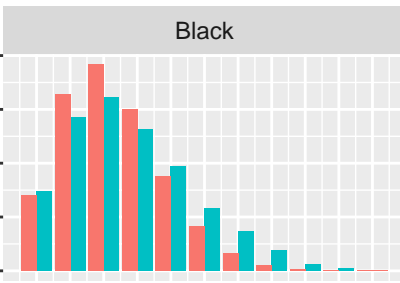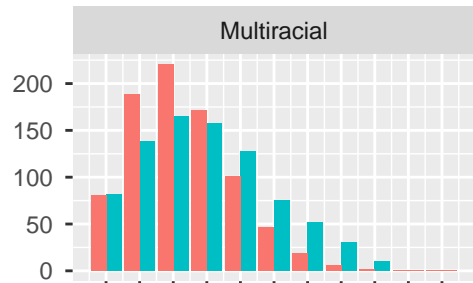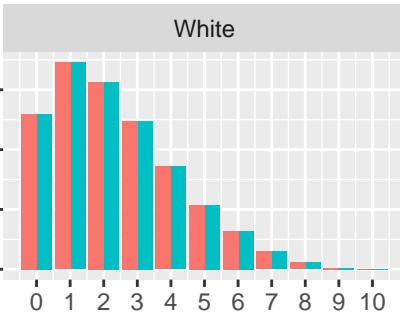

ACE Score ■ Intervened ■ Baseline

Simulated cases of anxiety averted per 1,000

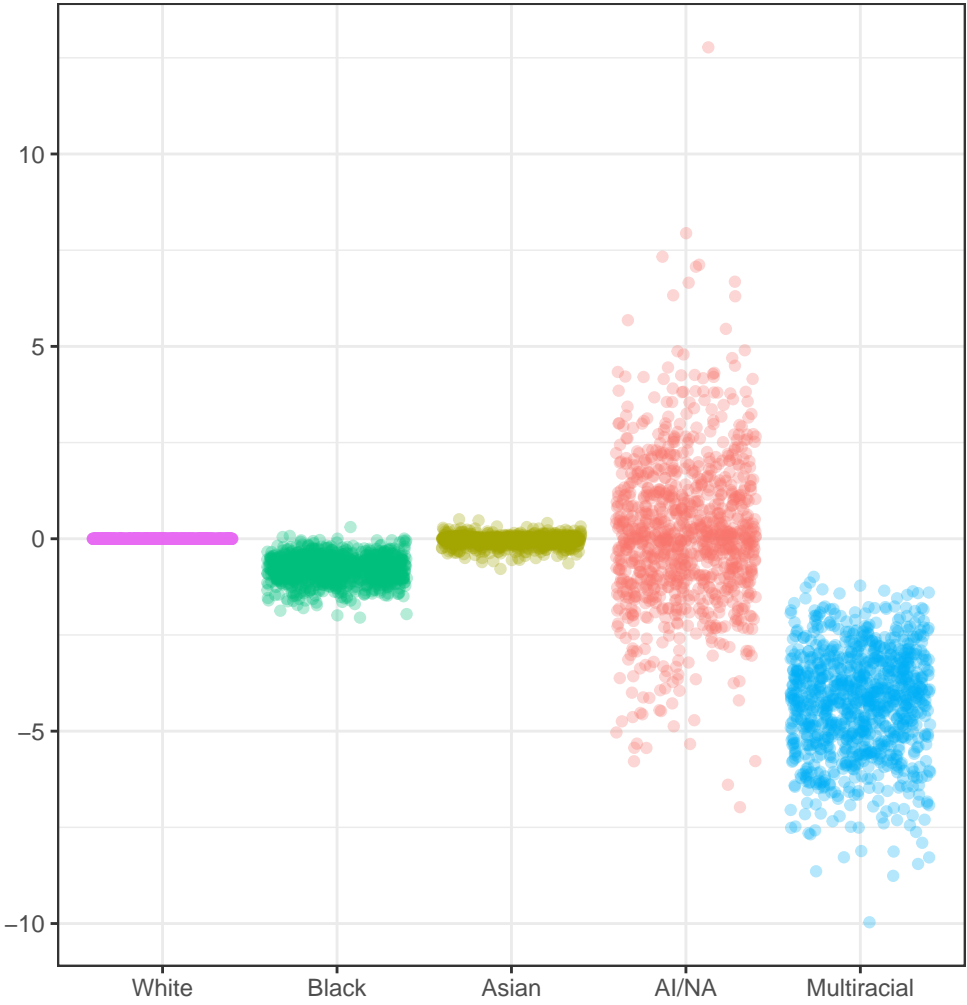

Source: https://medrxiv.org/content/10.1101/2023.06.04.23290940v1.full.pdf
